# Supplementary material for: TLC-spectrodensitometric method for simultaneous determination of dapagliflozin and rosuvastatin in rabbit plasma: stability indicating assay and kinetic studies
Source: Royal Society of Chemistry journal article supplement (doi:10.1039/d0ra05628f), 2020-01-01
Supplement: d0ra05628f1.pdf [file d0ra05628f1.pdf]

## Supporting information

### **TLC-spectrodensitometric method for simultaneous determination of dapagliflozin and rosuvastatin in rabbit plasma: Stability indicating assay and kinetic studies**

**Noha S. Abbas <sup>a\*</sup>, Sayed M. Derayea<sup>b</sup>, Mahmoud A. Omar <sup>b, c</sup>, Gamal A. Saleh<sup>d</sup>**

<sup>a</sup> Ministry of health and population, Assiut, Egypt

<sup>b</sup> Department of Analytical Chemistry, Faculty of Pharmacy, Minia University, Egypt.

<sup>c</sup> Department of Pharmacognosy and Pharmaceutical Chemistry, College of Pharmacy, Taibah University, Medinah, Saudi Arabia

<sup>d</sup> Department of Pharmaceutical Analytical Chemistry, Faculty of Pharmacy, Assiut University, Assiut 71526, Egypt.

\* [noha.abbas1987@gmail.com](mailto:noha.abbas1987@gmail.com), [noha.abbas2008@aun.edu.eg](mailto:noha.abbas2008@aun.edu.eg)

**Table S1:** Selection of mobile phase applied for separation of DAPA and ROSV.

| Mobile phase                             | Ratio (v: v) | R <sub>f</sub> value |             |
|------------------------------------------|--------------|----------------------|-------------|
|                                          |              | DAPA                 | ROSV        |
| Toluene: Methanol <sup>a</sup>           | 7:5          | 0.89                 | 0.75        |
|                                          | 5:5          | 0.86                 | 0.74        |
|                                          | 5:1          | 0.86                 | 0.75        |
| Ethyl acetate: Acetonitrile <sup>b</sup> | 5:1          | 0.76                 | 0.86        |
|                                          | 6:1          | 0.78                 | 0.88        |
|                                          | 5:5          | 0.69                 | 0.85        |
| Ethyl acetate: Methanol                  | <b>5:0.1</b> | <b>0.23</b>          | <b>0.44</b> |
|                                          | 5:5          | 0.78                 | 0.89        |
|                                          | 4:0.1        | 0.58                 | 0.67        |

***a*** Not well separated

***b*** Tailed Spots

**Table S2:** Selection of saturation time applied for separation of DAPA and ROSV.

| Saturation time (min) | R <sub>f</sub> of DAPA | % RSD <sup>a</sup> | R <sub>f</sub> of ROSV | % RSD <sup>a</sup> |
|-----------------------|------------------------|--------------------|------------------------|--------------------|
| 15                    | 0.37                   | 10.32              | 0.59                   | 11.08              |
| 20                    | 0.37                   | 8.02               | 0.58                   | 9.17               |
| 25                    | 0.30                   | 5.31               | 0.52                   | 5.87               |
| <b>30</b>             | <b>0.23</b>            | <b>2.11</b>        | <b>0.44</b>            | <b>2.23</b>        |
| 40                    | 0.22                   | 3.85               | 0.43                   | 3.22               |
| 45                    | 0.20                   | 2.53               | 0.42                   | 2.75               |

<sup>a</sup> Average of five readings.

**Table S3.** Intra-day and inter-day precision of the TLC method for determination of DAPA and ROSV (n=6)

| Drug | Amount<br>(ng/band) | Intra-day           | %RSD | Inter-day           | %RSD |
|------|---------------------|---------------------|------|---------------------|------|
|      |                     | Found $\pm$ SD      |      | Found $\pm$ SD      |      |
| DAPA | 500                 | 488.68 $\pm$ 12.71  | 2.60 | 487.65 $\pm$ 11.32  | 2.32 |
|      | 1500                | 1460.63 $\pm$ 28.28 | 1.93 | 1456.53 $\pm$ 43.19 | 2.96 |
|      | 2500                | 2512.83 $\pm$ 75.50 | 3.00 | 2494.32 $\pm$ 95.09 | 3.81 |
| ROSV | 500                 | 495.70 $\pm$ 11.97  | 2.41 | 474.14 $\pm$ 15.40  | 3.20 |
|      | 1500                | 1458.00 $\pm$ 43.97 | 3.01 | 1533.33 $\pm$ 44.98 | 2.93 |
|      | 2500                | 2473.80 $\pm$ 94.92 | 3.83 | 2577.63 $\pm$ 61.06 | 2.36 |

**Table S4.** Robustness of the proposed TLC for analysis of 100 ng/band DAPA and 250 ng/ band ROSV (n=3).

| Parameters                                    | % Recovery $\pm$ SD |                  |
|-----------------------------------------------|---------------------|------------------|
|                                               | DAPA                | ROSV             |
| No variation                                  | 101.5 $\pm$ 2.03    | 99.2 $\pm$ 2.19  |
| <b>Mobile phase composition</b>               |                     |                  |
| Ethyl acetate: Methanol (v/v)                 |                     |                  |
| 5.1:0.1                                       | 100.1 $\pm$ 0.56    | 100.1 $\pm$ 1.05 |
| 5:0.11                                        | 99.3 $\pm$ 1.39     | 100.8 $\pm$ 1.35 |
| Chamber saturation time<br>(30 min) optimized |                     |                  |
| (a) 27 min.                                   | 98.6 $\pm$ 1.32     | 99.3 $\pm$ 1.48  |
| (b) 33 min.                                   | 100.4 $\pm$ 1.62    | 101.1 $\pm$ 0.72 |
| Migration distance<br>(7cm) optimized         |                     |                  |
| (a) 6.7 cm                                    | 98.6 $\pm$ 1.47     | 101.2 $\pm$ 0.19 |
| (b) 7.3 cm                                    | 99.4 $\pm$ 0.86     | 99.3 $\pm$ 0.85  |

**Table S5:** Standard Addition Method for the Assay of the investigated drugs in dosage form

| Pharmaceutical<br>tablets | Authentic added<br>(ng/band) ** | Authentic found<br>(ng/band) | Recovery (%)<br>± SD* |
|---------------------------|---------------------------------|------------------------------|-----------------------|
| FORXIGA ®                 | 0                               | 0                            | 98.5 ± 0.50           |
|                           | 500                             | 494.93                       | 98.9 ± 3.38           |
|                           | 1000                            | 1009.17                      | 100.9 ± 3.76          |
|                           | 1500                            | 1498.45                      | 99.8 ± 2.99           |
| ROSUVAST®                 | 0                               | 0                            | 99.4 ± 2.19           |
|                           | 250                             | 247.83                       | 99.1 ± 2.43           |
|                           | 500                             | 497.43                       | 99.5 ± 2.60           |
|                           | 750                             | 751.06                       | 100.1 ± 3.26          |

\*Average of three determinations.

\*\* Amount of sample taken in standard addition study is 1000 and 500 ng /band for DAPA and ROSV, respectively.

**Table S6:** Peak purity and identification of the peaks for the simultaneous determination of DAPA and ROSV.

| <b>Solutions</b>       | <b>Concentration<br/>(ng/band)</b> | <b>r (s, m)<sup>a</sup></b> | <b>r (m, e)</b> |
|------------------------|------------------------------------|-----------------------------|-----------------|
| DAPA standard solution | 1000                               | 0.9997                      | 0.9998          |
| DAPA sample solution   | 1000                               | 0.9995                      | 0.9997          |
| ROSV standard solution | 500                                | 0.9985                      | 0.9998          |
| ROSV sample solution   | 500                                | 0.9996                      | 0.9980          |

a Correlation Coefficient from start to maximum position of the spectrum.

b Correlation Coefficient from maximum to end position of the spectrum.

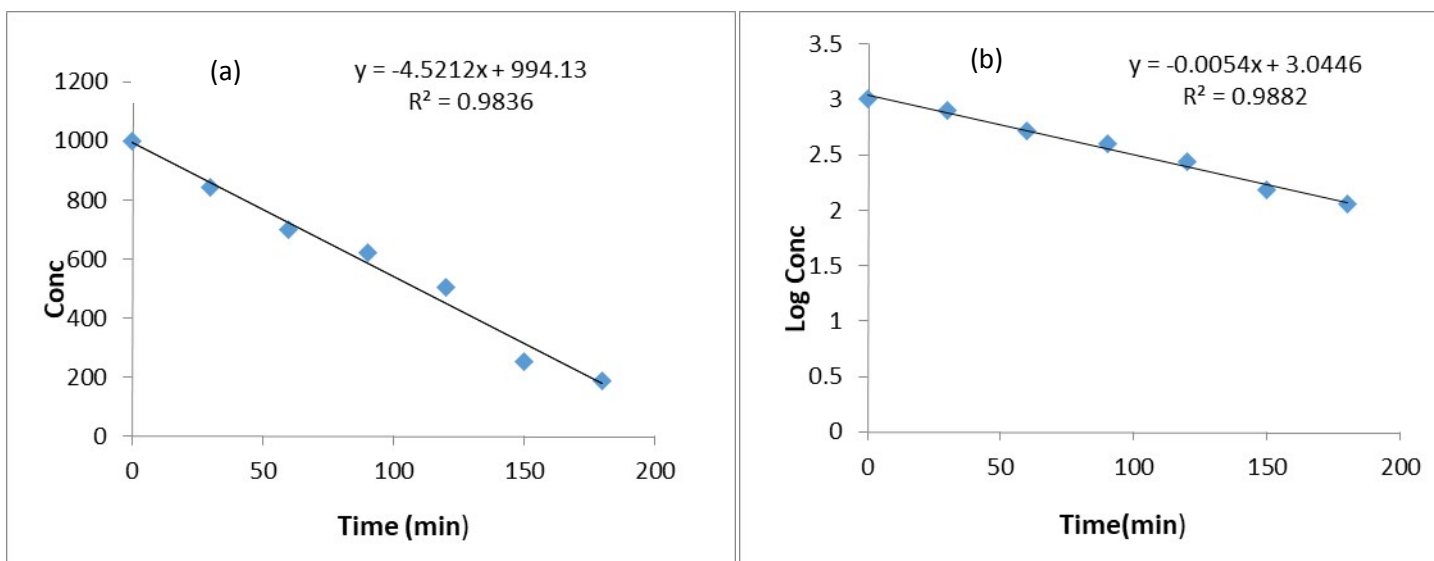

**Fig. S1:** The linear plots of concentration versus time (min) for the photo-degradation of DAPA (a) and ROSV (b).
